# Supplementary material for: Tau pathology induces loss of GABAergic interneurons leading to altered synaptic plasticity and behavioral impairments
Source: PubMed Central journal article supplement (PMC3893396; doi:10.1186/2051-5960-1-34), 2013-07-11

## Supplemental Figure 7

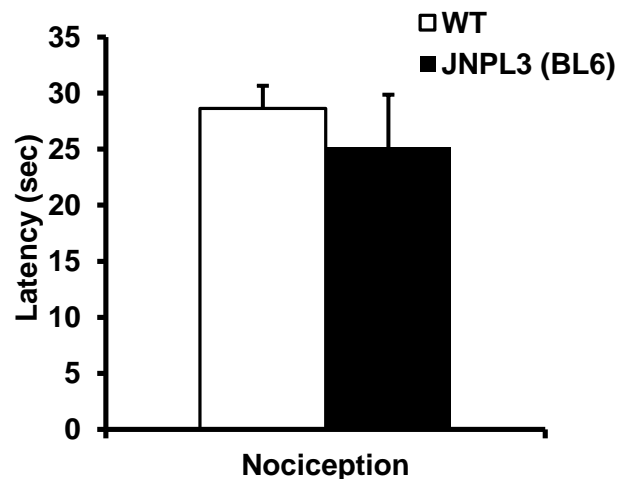

Supplement: 2051-5960-1-34-S7.pdf [file 2051-5960-1-34-S7.pdf]
